# Supplementary material for: Inhibition of MACC1-Induced Metastasis in Esophageal and Gastric Adenocarcinomas
Source: MDPI journal article supplement (doi:10.3390/cancers14071773), 2022-03-31
Supplement: s1 [file s1]

.Supplement

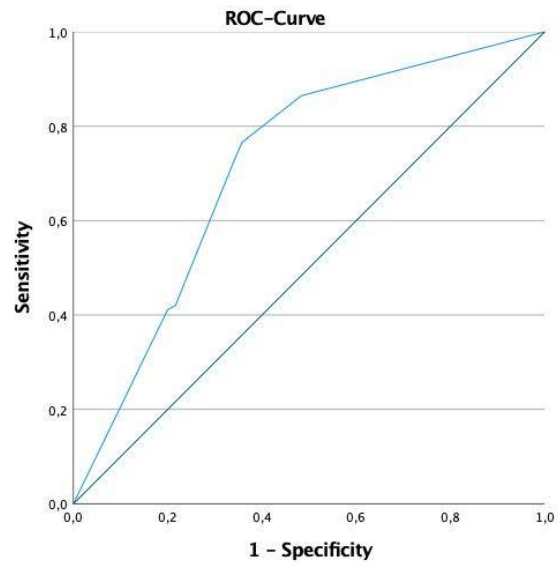

**Figure S1.** ROC Curve for IRS cut-off analysis (AUC 0.716 [0.656 – 0.776]).

**Table S1.** Sensitivity, specificity and Youden Index for different IRS cut-off values.

| Positive if Greater than<br>or Equal to | Sensitivity  | 1- Specificity | Specificity  | Youden Index |
|-----------------------------------------|--------------|----------------|--------------|--------------|
| -1                                      | 1            | 1              | 0            | 0            |
| 1                                       | 0.869        | 0.500          | 0.500        | 0.369        |
| 3                                       | 0.864        | 0.483          | 0.517        | 0.381        |
| <b>5</b>                                | <b>0.766</b> | <b>0.358</b>   | <b>0.642</b> | <b>0.408</b> |
| 7                                       | 0.729        | 0.342          | 0.658        | 0.387        |
| 8,5                                     | 0.421        | 0.217          | 0.783        | 0.204        |
| 10,5                                    | 0.411        | 0.200          | 0.800        | 0.211        |
| 13                                      | 0            | 0              | 1            | 0            |

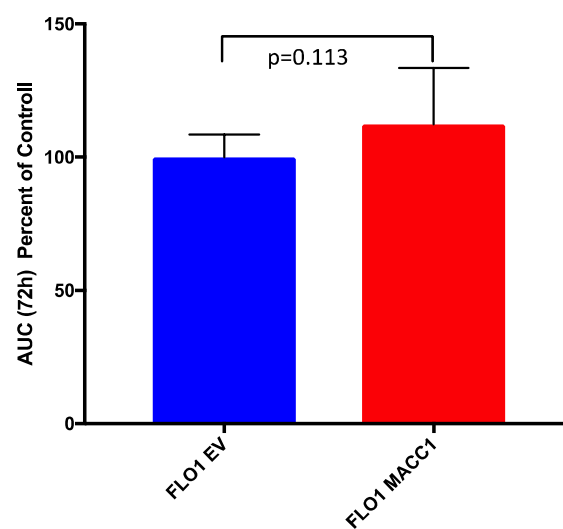

**Figure S2.** Proliferation of FLO1 EV and FLO1 MACC1 over 72 h. Analysis of in vitro proliferation assay.
